## Addendum

**Addendum: Melatonin increases overall survival of prostate cancer patients with poor prognosis after combined hormone radiation treatment****Gennady M. Zharinov<sup>1</sup>, Oleg A. Bogomolov<sup>1</sup>, Irina V. Chepurnaya<sup>1</sup>, Natalia Yu. Neklasova<sup>1</sup> and Vladimir N. Anisimov<sup>2</sup>**<sup>1</sup>A.M. Granov Russian Research Center for Radiology and Surgical Technologies of the Ministry of Health of the Russian Federation, Pesochny, St. Petersburg 197758, Russia<sup>2</sup>N.N. Petrov National Medical Research Center of Oncology, Pesochny, St. Petersburg 197758, Russia**Published:** February 25, 2023**Copyright:** © 2023 Zharinov et al. This is an open access article distributed under the terms of the [Creative Commons Attribution License](#) (CC BY 3.0), which permits unrestricted use, distribution, and reproduction in any medium, provided the original author and source are credited.**This article has an addendum:** Patient consent was required and obtained. This study was approved by the Russian Research Centre of Radiology and Surgical Technologies Ethics Committee (Approval #1041Y).Original article: Oncotarget. 2020; 11:3723–3729. <https://doi.org/10.18632/oncotarget.27757>
